# Supplementary material for: Adverse Events Associated with Ethical Kampo Formulations: Analysis of the Domestic Adverse-Event Data Reports of the Ministry of Health, Labor, and Welfare in Japan
Source: PubMed Central journal article supplement (PMC6500660; doi:10.1155/2019/1643804), 2019-04-15
Supplement: 1643804.f1.pdf [file 1643804.f1.pdf]

**Table S1.** The number of reported adverse events associated with ethical Kampo formulations related to liver injury

| Reported AEs related to liver injury | NEs   |
|--------------------------------------|-------|
| Drug-induced liver injury            | 205   |
| Liver injury                         | 325   |
| Liver cell damage                    | 1     |
| Mixed liver damage                   | 1     |
| Liver function abnormality           | 467   |
| Liver function test abnormality      | 1     |
| Liver function test value elevation  | 3     |
| Liver enzyme elevation               | 2     |
| Aspartate aminotransferase increase  | 3     |
| Alanine aminotransferase increase    | 3     |
| Gamma-glutamyltransferase increase   | 3     |
| Blood alkaline phosphatase increase  | 1     |
| Hepatitis                            | 23    |
| Acute hepatitis                      | 57    |
| Fulminant hepatitis                  | 15    |
| Chronic hepatitis                    | 1     |
| Autoimmune hepatitis                 | 5     |
| Cholestatic hepatitis                | 3     |
| Hepatic failure                      | 3     |
| Acute hepatic failure                | 3     |
| Jaundice                             | 65    |
| Hepatocellular jaundice              | 1     |
| Blood bilirubin increase             | 1     |
| Hyperbilirubinemia                   | 1     |
| Total                                | 1,193 |

AEs: Adverse events; NEs: Number of reported adverse events.

**Table S2.** The number of reported adverse events associated with ethical Kampo formulations related to lung injury

| Reported AEs related to lung injury | NEs   |
|-------------------------------------|-------|
| Interstitial lung disease           | 852   |
| Lung injury                         | 133   |
| Pneumonia                           | 114   |
| Eosinophilic pneumonia              | 22    |
| Acute eosinophilic pneumonia        | 7     |
| Chronic eosinophilic pneumonia      | 1     |
| Organizing pneumonia                | 5     |
| Idiopathic organizing pneumonia     | 1     |
| Cryptogenic organizing pneumonia    | 1     |
| Pneumonitis                         | 8     |
| Allergic alveolitis                 | 2     |
| Lung fibrosis                       | 2     |
| Idiopathic interstitial pneumonia   | 1     |
| Acute respiratory distress syndrome | 4     |
| Dyspnea                             | 17    |
| Respiratory failure                 | 7     |
| Total                               | 1,177 |

AEs: Adverse events; NEs: Number of reported adverse events.

**Table S3.** The number of reported adverse events associated with ethical Kampo formulations related to pseudoaldosteronism

| Reported AEs related to PA             | NEs | Reported AEs related to PA      | NEs |
|----------------------------------------|-----|---------------------------------|-----|
| Pseudoaldosteronism                    | 217 | Heart failure-related events    | 46  |
| Pseudoaldosteronism                    | 217 | Heart failure                   | 18  |
| Hypertension-related events            | 13  | Congestive heart failure        | 16  |
| Hypertension                           | 7   | Acute heart failure             | 4   |
| Blood pressure elevation               | 6   | Left ventricular failure        | 2   |
| Edema-related events                   | 25  | Right ventricular failure       | 1   |
| Edema                                  | 7   | Lung edema                      | 2   |
| Generalized edema                      | 5   | Acute lung edema                | 2   |
| Peripheral edema                       | 12  | Pericardial effusion            | 1   |
| Body weight increase                   | 1   | Arrhythmia-related events       | 95  |
| Electrolyte abnormality-related events | 308 | Arrhythmia                      | 7   |
| Hypokalemia                            | 291 | Supraventricular arrhythmia     | 2   |
| Blood potassium decrease               | 10  | Ventricular arrhythmia          | 4   |
| Hypernatremia                          | 2   | Tachyarrhythmia                 | 2   |
| Metabolic alkalosis                    | 5   | Extrasystole                    | 3   |
| Muscle injury-related events           | 176 | Supraventricular extrasystole   | 1   |
| Myopathy                               | 32  | Ventricular extrasystole        | 4   |
| Rhabdomyolysis                         | 104 | Ventricular tachycardia         | 14  |
| Muscle weakness                        | 6   | Ventricular fibrillation        | 14  |
| Paralysis                              | 4   | Atrial fibrillation             | 3   |
| Extremities paralysis                  | 4   | Atrioventricular block          | 1   |
| Extremities paresis                    | 1   | Complete atrioventricular block | 3   |
| Asthenia                               | 6   | Long QT syndrome                | 6   |
| Blood creatine phosphokinase increase  | 14  | Electrocardiogram long QT       | 12  |
| Myalgia                                | 1   | Torsades de pointes             | 19  |
| Tetany                                 | 1   | Other events                    | 9   |
| Myositis                               | 1   | Cortisol increase               | 1   |
| Muscle enzyme elevation                | 1   | Blood cortisol increase         | 1   |
| Myoglobinuria                          | 1   | Renin decrease                  | 1   |
|                                        |     | Hyperglycemia                   | 4   |
|                                        |     | Diabetes mellitus               | 2   |
|                                        |     | Total                           | 889 |

AEs: Adverse events; NEs: Number of reported adverse events; PA, pseudoaldosteronism.

**Table S4.** The number of reported adverse events associated with ethical Kampo formulations related to mesenteric phlebosclerosis

| Reported AEs related to MP            | NEs |
|---------------------------------------|-----|
| Mesenteric phlebosclerosis            | 119 |
| Idiopathic mesenteric phlebosclerosis | 47  |
| Phlebosclerosis                       | 9   |
| Colitis                               | 14  |
| Ischemic colitis                      | 6   |
| Intestinal obstruction                | 3   |
| Ileus                                 | 6   |
| Digestive tract perforation           | 5   |
| Colon perforation                     | 3   |
| Peritonitis                           | 5   |
| Colon ulcer                           | 1   |
| Colon stenosis                        | 1   |
| Abdominal pain                        | 3   |
| Lower abdominal pain                  | 1   |
| Total                                 | 223 |

AEs: Adverse events; MP: Mesenteric phlebosclerosis; NRs: Number of reported adverse events.

**Table S5.** The number of reported adverse events associated with ethical Kampo formulations related to drug eruption

| Reported AEs related to drug eruption                | NEs |
|------------------------------------------------------|-----|
| Drug eruption                                        | 62  |
| Drug eruption with eosinophilia and systemic symptom | 3   |
| Drug-induced dermatitis                              | 5   |
| Eruption                                             | 15  |
| Urticaria                                            | 4   |
| Eczema                                               | 2   |
| Papula                                               | 1   |
| Systemic skin eruption                               | 19  |
| Pustular skin eruption                               | 1   |
| Erythema                                             | 3   |
| Multiple form erythema                               | 23  |
| Systemic erythema                                    | 4   |
| Stevens-Johnson syndrome                             | 20  |
| Mucocutaneous ocular syndrome                        | 2   |
| Toxic epidermal necrolysis                           | 4   |
| Acute generalized exanthematous pustulosis           | 6   |
| Exfoliative dermatitis                               | 2   |
| Dermatitis                                           | 1   |
| Atopic dermatitis                                    | 2   |
| Contact dermatitis                                   | 1   |
| Psoriasis-like dermatitis                            | 1   |
| Pustular acne                                        | 1   |
| Pemphigoid                                           | 1   |
| Pustular psoriasis                                   | 1   |
| Blister                                              | 1   |
| Total                                                | 185 |

AEs: Adverse events; NEs: Number of reported adverse events.

**Table S6.** List of ethical Kampo formulations in Japanese and Chinese

| Ethical Kampo formulations |                                    | Ethical Kampo formulations     |                                               |
|----------------------------|------------------------------------|--------------------------------|-----------------------------------------------|
| In Japanese                | In Chinese                         | In Japanese                    | In Chinese                                    |
| Anchusan                   | An Zhong San                       | Kyukichoketsuin                | Xiong Gui Diao Xue Yin                        |
| Bakumondoto                | Mai Men Dong Tang                  | Kyukikyogaito                  | Xiong Gui Jiao Ai Tang                        |
| Bofutsushosan              | Fang Feng Tong Sheng San           | Makyokansekito                 | Ma Xing Gan Shi Tang                          |
| Boiogito                   | Fang Yi Huang Qi Tang              | Makyoyokukanto                 | Ma Xing Yi Gan Tang                           |
| Bukuryoin                  | Fu Ling Yin                        | Maobushisaishinto              | Ma Huang Fu Zi Xi Xin Tang                    |
| Bukuryoingohangekobokuto   | Fu Ling Yin He Ban Xia Hou Pu Tang | Maoto                          | Ma Huang Tang                                 |
| Bushirichuto               | Fu Zi Li Zhong Tang                | Mashiningan                    | Ma Zi Ren Wan                                 |
| Byakkokaninjinto           | Bai Hu Jia Ren Shen Tang           | Mokuboito                      | Mu Fang Yi Tang                               |
| Chikujountanto             | Zhu Ru Wen Dan Tang                | Nichinto                       | Er Chen Tang                                  |
| Chojokito                  | Diao Wei Cheng Qi Tang             | Nijutsuto                      | Er Zhu Tang                                   |
| Choreito                   | Zhu Ling Tang                      | Ninjin'yoeito                  | Ren Shen Yang Rong Tang                       |
| Choreitogoshimotsuto       | Zhu Ling Tang He Si Wu Tang        | Ninjinto                       | Ren Shen Tang                                 |
| Chotosan                   | Diao Teng San                      | Nyoshinsan                     | Nu Shen San                                   |
| Choyoto                    | Chang Yong Tang                    | Ogikenchuto                    | Huang Qi Jian Zhong Tang                      |
| Daibofuto                  | Da Fang Feng Tang                  | Ogonto                         | Huang Qin Tang                                |
| Daijokito                  | Da Cheng Qi Tang                   | Orengedokuto                   | Huang Lian Jie Du Tang                        |
| Daikenchuto                | Da Jian Zhong Tang                 | Orento                         | Huang Lian Tang                               |
| Daibotampito               | Da Huang Mu Dan Pi Tang            | Otsujito                       | Yi Zi Tang                                    |
| Daiokanzoto                | Da Huang Gan Cao Tang              | Rikkosan                       | Li Xiao San                                   |
| Daisaikoto                 | Da Chai Hu Tang                    | Rikkunshito                    | Liu Jun Zi Tang                               |
| Daisaikotokyoadaio         | Da Chai Hu Tang Qu Da Huang        | Rokumigan                      | Liu Wei Wan                                   |
| Eppikajutsuto              | Yue Bi Jia Zhu Tang                | Ryokanyomishingeninto          | Ling Gan Jiang Wei Xin Xia Ren Tang           |
| Gokoto                     | Wu Hu Tang                         | Ryokeijutsukanto               | Ling Gui Zhu Gan Tang                         |
| Goreisan                   | Wu Ling San                        | Ryokyojutsukanto               | Ling Jiang Zhu Gan Tang                       |
| Gorinsan                   | Wu Lin San                         | Ryutanshakanto                 | Long Dan Xie Gan Tang                         |
| Goshajinkigan              | Niu Che Shen Qi Wan                | Saibokuto                      | Chai Pu Tang                                  |
| Goshakusan                 | Wu Ji San                          | Saikanto                       | Chai Xian Tang                                |
| Goshuyuto                  | Wu Zhu Yu Tang                     | Saikokaryukotsuboreito         | Chai Hu Jia Long Gu Mu Li Tang                |
| Hachimijiojan              | Ba Wei Di Huang Wan                | Saikokeishikankyoto            | Chai Hu Gui Zhi Qian Jiang Tang               |
| Hainosankyuto              | Pai Nong San Ji Tang               | Saikokeishito                  | Chai Hu Gui Zhi Tang                          |
| Hangebyakujutsutemmato     | Ban Xia Bai Zhu Tian Ma Tang       | Saikoseikanto                  | Chai Hu Qing Gan Tang                         |
| Hangekobokuto              | Ban Xia Hou Pu Tang                | Saireito                       | Chai Ling Tang                                |
| Hangeshashinto             | Ban Xia Xie Xin Tang               | Sammotsuogonto                 | San Wu Huang Qin Tang                         |
| Heisan                     | Ping Wei San                       | San'oshashinto                 | San Huang Xie Xin Tang                        |
| Hochuekkito                | Bu Zhong Yi Qi Tang                | Sansoninto                     | Suan Zao Ren Tang                             |
| Inchingoreisan             | Yin Chen Wu Ling San               | Seihaito                       | Qing Fei Tang                                 |
| Inchinkoto                 | Yin Chen Hao Tang                  | Seijobofuto                    | Qing Shang Fang Feng Tang                     |
| Ireito                     | Wei Ling Tang                      | Seishinrenshin                 | Qing Xin Lian Zi Yin                          |
| Jidabokuippo               | Zhi Da Pu Yi Fang                  | Seishoekkito                   | Qing Shu Yi Qi Tang                           |
| Jiinkokato                 | Zi Yin Jiang Huo Tang              | Senkyuchachosan                | Chuan Xiong Cha Diao San                      |
| Jiinshihoto                | Zi Yin Zhi Bao Tang                | Shakanzoto                     | Zhi Gan Cao Tang                              |
| Jinsoin                    | Can Su Yin                         | Shakuyakukanzobushito          | Shao Yao Gan Cao Fu Zi Tang                   |
| Jizusoippo                 | Zhi Tou Chuang Yi Fang             | Shakuyakukanzoto               | Shao Yao Gan Cao Tang                         |
| Jumihaidokuto              | Shi Wei Bai Du Tang                | Shichimotsukokato              | Qi Wu Jiang Xia Tang                          |
| Junchoto                   | Run Chang Tang                     | Shigyakusan                    | Si Ni San                                     |
| Juzentaihoto               | Shi Quan Da Bu Tang                | Shikunshito                    | Si Jun Zi Tang                                |
| Kakkonkajutsubuto          | Ge Gen Jia Zhu Fu Tang             | Shimbuto                       | Zhen Wu Tang                                  |
| Kakkonto                   | Ge Gen Tang                        | Shimotsuto                     | Si Wu Tang                                    |
| Kakkontokasenkyushin'ï     | Ge Gen Tang Jia Chuan Xiong Xin Yi | Shimpito                       | Shen Mi Tang                                  |
| Kamikihito                 | Jia Wei Gui Pi Tang                | Shin'iseihaito                 | Xin Yi Qing Fei Tang                          |
| Kamishoyosan               | Jia Wei Xiao Yao San               | Shireito                       | Si Ling Tang                                  |
| Kanbakutaisoto             | Gan Mai Da Zao Tang                | Shishihakuhihito               | Zhi Zi Bai Pi Tang                            |
| Kanzoto                    | Gan Cao Tang                       | Shiunko                        | Zi Yun Gao                                    |
| Keigairengyoto             | Jing Jie Lian Qiao Tang            | Shofusan                       | Xiao Feng San                                 |
| Keihito                    | Qi Pi Tang                         | Shohangekabukuryoto            | Xiao Ban Xia Jia Fu Ling Tang                 |
| Keimakukahanto             | Gui Ma Ge Ban Tang                 | Shokenchuto                    | Xiao Jian Zhong Tang                          |
| Keishakuchimoto            | Gui Shao Zhi Mu Tang               | Shomakakkonto                  | Sheng Ma Ge Gen Tang                          |
| Keishibukuryogankayokuinin | Gui Zhi Fu Ling Wan Jia Yi Yi Ren  | Shosaikoto                     | Xiao Chai Hu Tang                             |
| Keishibukuryogan           | Gui Zhi Fu Ling Wan                | Shosaikotokakikyosekko         | Xiao Chai Hu Tang Jia Jie Geng Shi Gao        |
| Keishikajutsubuto          | Gui Zhi Jia Zhu Fu Tang            | Shoseiryuto                    | Xiao Qing Long Tang                           |
| Keishikakakkonto           | Gui Zhi Jia Ge Gen Tang            | Sokeikakketsuto                | Shu Jing Huo Xue Tang                         |
| Keishikakobokuyoninto      | Gui Zhi Jia Hou Pu Xing Ren Tang   | Tokakujokito                   | Tao He Cheng Qi Tang                          |
| Keishikaogito              | Gui Zhi Jia Huang Qi Tang          | Tokiinshi                      | Dang Gui Yin Zi                               |
| Keishikaryoujutsubuto      | Gui Zhi Jia Ling Zhu Fu Tang       | Tokikenchuto                   | Dang Gui Jian Zhong Tang                      |
| Keishikaryukotsuboreito    | Gui Zhi Jia Long Gu Mu Li Tang     | Tokishakuyakusan               | Dang Gui Shao Yao San                         |
| Keishikashakuyakudaioto    | Gui Zhi Jia Shao Yao Da Huang Tang | Tokishakuyakusanabushi         | Dang Gui Shao Yao San Jia Fu Zi               |
| Keishikashakuyakuto        | Gui Zhi Jia Shao Yao Tang          | Tokishigyakukagoshuyushokyoito | Dang Gui Si Ni Jia Wu Zhu Yu Sheng Jiang Tang |
| Keishininjinto             | Gui Zhi Ren Shen Tang              | Tokito                         | Dang Gui Tang                                 |
| Keishito                   | Gui Zhi Tang                       | Tsudosan                       | Tong Dao San                                  |
| Kihito                     | Gui Pi Tang                        | Unkeito                        | Wen Jing Tang                                 |
| Kikyosekko                 | Jie Geng Shi Gao                   | Unseiin                        | Wen Qing Yin                                  |
| Kikyoto                    | Jie Geng Tang                      | Yokuininto                     | Yi Yi Ren Tang                                |
| Kososan                    | Xiang Su San                       | Yokukansan                     | Yi Gan San                                    |
| Kumibinroto                | Jiu Wei Bing Lang Tang             | Yokukansanchimpihange          | Yi Gan San Jia Chen Pi Ban Xia                |

**Table S7.** Ethical Kampo formulations suspected of being related to liver injury

| RO | Ethical Kampo formulations | SR | NEs | RO | Ethical Kampo formulations    | SR | NEs |
|----|----------------------------|----|-----|----|-------------------------------|----|-----|
| 1  | Bofutsushosan              | +  | 177 | 42 | Ryutanshakanto                | +  | 6   |
| 2  | Saireito                   | +  | 113 | 42 | Goshajinkigan                 |    | 6   |
| 3  | Saikokaryukotsuboreito     | +  | 72  | 44 | Hachimijiogan                 |    | 5   |
| 4  | Daikenchuto                |    | 45  | 44 | Eppikajutsuto                 |    | 5   |
| 5  | Orengedokuto               | +  | 44  | 44 | Ryokeijutsukanto              |    | 5   |
| 6  | Hangeshashinto             | +  | 42  | 44 | Tsudosan                      |    | 5   |
| 7  | Otsujito                   | +  | 38  | 48 | Goshuyuto                     |    | 4   |
| 7  | Saikokeishikankyoto        | +  | 38  | 48 | Daisaikotokyodaio             | +  | 4   |
| 9  | Saibokuto                  | +  | 36  | 50 | Keishikaryukotsuboreito       |    | 3   |
| 10 | Kakkonto                   |    | 33  | 50 | Yokukansankachimpihange       |    | 3   |
| 11 | Shin'iseihaito             | +  | 32  | 50 | Keishibukuryogankayokuinin    |    | 3   |
| 12 | Yokukansan                 |    | 26  | 50 | Inchinkoto                    |    | 3   |
| 13 | Daisaikoto                 | +  | 23  | 50 | Kamikihito                    |    | 3   |
| 13 | Keigairengyoto             | +  | 23  | 55 | Byakkokaninjinto              |    | 2   |
| 13 | Seishinrenshiin            | +  | 23  | 55 | Tokishigyakukagoshuyushokyoto |    | 2   |
| 16 | Rikkunshito                |    | 22  | 55 | Sokeikakketsuto               |    | 2   |
| 17 | Saikokeishito              | +  | 21  | 55 | Keishikashakuyakuto           |    | 2   |
| 18 | Shosaikoto                 | +  | 19  | 55 | Bukuryoingohangekobokuto      |    | 2   |
| 18 | Bakumondoto                |    | 19  | 60 | Kakkontokasenkyushin'i        |    | 1   |
| 18 | Shakuyakukanzoto           |    | 19  | 60 | Jumihaidokuto                 |    | 1   |
| 21 | Goreisan                   |    | 18  | 60 | Ninjinto                      |    | 1   |
| 22 | Kamishoyosan               |    | 17  | 60 | Hangebyakujutsutemmato        |    | 1   |
| 22 | Seijobofuto                | +  | 17  | 60 | Makyokansekito                |    | 1   |
| 24 | Nyoshinsan                 | +  | 16  | 60 | Gorinsan                      | +  | 1   |
| 25 | Boiogito                   |    | 15  | 60 | Jizusoippo                    |    | 1   |
| 25 | Tokishakuyakusan           |    | 15  | 60 | Goshakusan                    |    | 1   |
| 27 | Hochuekkito                |    | 14  | 60 | Kososan                       |    | 1   |
| 27 | Unseiin                    | +  | 14  | 60 | Shimotsuto                    |    | 1   |
| 29 | Maoto                      |    | 13  | 60 | Saikanto                      | +  | 1   |
| 30 | Keishibukuryogan           |    | 12  | 60 | Shikunshito                   |    | 1   |
| 31 | Seihaito                   | +  | 10  | 60 | Daiokanzoto                   |    | 1   |
| 31 | Maobushisaishinto          |    | 10  | 60 | Tokiinshi                     |    | 1   |
| 33 | Hangekobokuto              |    | 9   | 60 | Jidabokuippo                  |    | 1   |
| 34 | Shoseiryuto                |    | 8   | 60 | Chikujountanto                |    | 1   |
| 34 | Nijutsuto                  | +  | 8   | 60 | Daibofuto                     |    | 1   |
| 34 | Shosaikotokakikyosekko     | +  | 8   | 60 | Shokenchuto                   |    | 1   |
| 34 | Sammotsuogonto             | +  | 8   | 60 | Hainosankyuto                 |    | 1   |
| 38 | Choreito                   |    | 7   | 60 | Senkyuchachosan               |    | 1   |
| 38 | Juzentaihoto               |    | 7   | 60 | Keishikashakuyakudaioto       |    | 1   |
| 38 | Junchoto                   | +  | 7   | 60 | Keishakuchimoto               |    | 1   |
| 38 | Tokakujokito               |    | 7   | 60 | Keishikaryoujutsubuto         |    | 1   |

NEs: Number of reported adverse events; RO: Rank order; SR: Scutellariae Radix.

**Table S8.** Ethical Kampo formulations suspected of being related to lung injury

| RO | Ethical Kampo formulations | SR | NEs | RO | Ethical Kampo formulations    | SR | NEs |
|----|----------------------------|----|-----|----|-------------------------------|----|-----|
| 1  | Saireito                   | +  | 142 | 42 | Maobushisaishinto             |    | 4   |
| 2  | Bofutsushosan              | +  | 108 | 46 | Shimbuto                      |    | 3   |
| 3  | Otsujito                   | +  | 65  | 46 | Choreito                      |    | 3   |
| 4  | Hangeshashinto             | +  | 62  | 46 | Sokeikakketsuto               |    | 3   |
| 5  | Shosaikoto                 | +  | 56  | 46 | Keishikashakuyakuto           |    | 3   |
| 6  | Seishinrenshiin            | +  | 50  | 46 | Yokukansankachimpihange       |    | 3   |
| 7  | Saikokaryukotsuboreito     | +  | 46  | 46 | Chikujountanto                |    | 3   |
| 8  | Shakuyakukanzoto           |    | 32  | 46 | Kamikihito                    |    | 3   |
| 9  | Orengedokuto               | +  | 31  | 53 | Hachimijiojan                 |    | 2   |
| 10 | Saibokuto                  | +  | 29  | 53 | Shofusan                      |    | 2   |
| 10 | Goshajinkigan              |    | 29  | 53 | Tokishigyakukagoshuyushokyoto |    | 2   |
| 12 | Yokukansan                 |    | 28  | 53 | Ryokeijutsukanto              |    | 2   |
| 13 | Shin'iseihaito             | +  | 27  | 53 | Keishito                      |    | 2   |
| 14 | Daisaikoto                 | +  | 26  | 53 | Chotosan                      |    | 2   |
| 15 | Hochuekkito                |    | 24  | 53 | Makyokansekito                |    | 2   |
| 16 | Saikokeishito              | +  | 23  | 53 | Nyoshinsan                    | +  | 2   |
| 16 | Bakumondoto                |    | 23  | 53 | Tokiinshi                     |    | 2   |
| 16 | Nijutsuto                  | +  | 23  | 53 | Jidabokuippo                  |    | 2   |
| 19 | Saikokeishikankyoto        | +  | 22  | 53 | Gokoto                        |    | 2   |
| 20 | Daikenchuto                |    | 20  | 64 | Kamishoyosan                  |    | 1   |
| 21 | Shoseiryuto                |    | 19  | 64 | Keishikaryukotsuboreito       |    | 1   |
| 22 | Rikkunshito                |    | 17  | 64 | Eppikajutsuto                 |    | 1   |
| 22 | Junchoto                   | +  | 17  | 64 | Goshuyuto                     |    | 1   |
| 22 | Unseiin                    | +  | 17  | 64 | Byakkokaninjinto              |    | 1   |
| 25 | Keishibukuryogan           |    | 15  | 64 | Hangebyakujutsutemmato        |    | 1   |
| 25 | Seihaito                   | +  | 15  | 64 | Seijobofuto                   | +  | 1   |
| 27 | Ryutanshakanto             | +  | 14  | 64 | Kihito                        |    | 1   |
| 28 | Sammotsuogonto             | +  | 12  | 64 | Shimotsuto                    |    | 1   |
| 29 | Boiogito                   |    | 11  | 64 | Chojokito                     |    | 1   |
| 30 | Kakkonto                   |    | 9   | 64 | Saikoseikanto                 | +  | 1   |
| 30 | Tokishakuyakusan           |    | 9   | 64 | Daiokanzoto                   |    | 1   |
| 32 | Goreisan                   |    | 8   | 64 | Shimpito                      |    | 1   |
| 32 | Keigairengyoto             | +  | 8   | 64 | Jiinshihoto                   |    | 1   |
| 32 | Gorinsan                   | +  | 8   | 64 | Shokenchuto                   |    | 1   |
| 32 | Mashiningan                |    | 8   | 64 | Ryokankyomishingeninto        |    | 1   |
| 36 | Hangekobokuto              |    | 7   | 64 | Keishikashakuyakudaioto       |    | 1   |
| 36 | Maoto                      |    | 7   | 64 | Inchinkoto                    |    | 1   |
| 36 | Juzentaihoto               |    | 7   | 64 | Seishoekkito                  |    | 1   |
| 36 | Shosaikotokakikyosekko     | +  | 7   | 64 | Kikyoto                       |    | 1   |
| 40 | Tokakujokito               |    | 6   | 64 | Kikyosekko                    |    | 1   |
| 40 | San'oshashinto             | +  | 6   | 64 | Kanzoto                       |    | 1   |
| 42 | Jumihaidokuto              |    | 4   | 64 | Shakuyakukanzobushito         |    | 1   |
| 42 | Keishikajutsubuto          |    | 4   | 64 | Kakkonkajutsubuto             |    | 1   |
| 42 | Ninjin'yoeito              |    | 4   | 64 | Keishikaogito                 |    | 1   |

NEs: Number of reported adverse events; RO: Rank order; SR: Scutellariae Radix.



**Table S9.** Ethical Kampo formulations suspected of being related to pseudohyperaldosteronism

| RO | Ethical Kampo formulations | NEs | RO | Ethical Kampo formulations | NEs |
|----|----------------------------|-----|----|----------------------------|-----|
| 1  | Shakuyakukanzoto           | 397 | 25 | Gokoto                     | 3   |
| 2  | Yokukansan                 | 171 | 25 | Kikyoto                    | 3   |
| 3  | Hochuekkito                | 43  | 25 | Keishikaryoujutsubuto      | 3   |
| 4  | Kakkonto                   | 36  | 25 | Shakuyakukanzobushito      | 3   |
| 5  | Rikkunshito                | 24  | 31 | Kakkontokasenkyushin'i     | 2   |
| 6  | Bakumondoto                | 18  | 31 | Otsujito                   | 2   |
| 7  | Daiokanzoto                | 15  | 31 | Keishikaryukotsuboreito    | 2   |
| 8  | Kamishoyosan               | 14  | 31 | Maoto                      | 2   |
| 9  | Juzentaihoto               | 12  | 31 | Shigyakusan                | 2   |
| 9  | Saireito                   | 12  | 31 | Keishikashakuyakuto        | 2   |
| 11 | Boiogito                   | 11  | 31 | Kososan                    | 2   |
| 11 | Bofutsushosan              | 11  | 31 | Saibokuto                  | 2   |
| 13 | Ryokeijutsukanto           | 10  | 31 | Seishinrenshin             | 2   |
| 13 | Yokukansankachimpihange    | 10  | 40 | Saikokeishikankyoto        | 1   |
| 15 | Shoseiryuto                | 9   | 40 | Keishito                   | 1   |
| 16 | Ninjinto                   | 8   | 40 | Makyokansekito             | 1   |
| 17 | Hangeshashinto             | 7   | 40 | Tokakujokito               | 1   |
| 18 | Chotosan                   | 6   | 40 | Kanbakutaisoto             | 1   |
| 19 | Saikokeishito              | 5   | 40 | Tokiinshi                  | 1   |
| 19 | Byakkokaninjinto           | 5   | 40 | Tsudosan                   | 1   |
| 19 | Sokeikakketsuto            | 5   | 40 | Ninjin'yoeito              | 1   |
| 22 | Shosaikoto                 | 4   | 40 | Ryokyojutsukanto           | 1   |
| 22 | Keishikajutsubuto          | 4   | 40 | Keishikashakuyakudaioto    | 1   |
| 22 | Kanzoto                    | 4   | 40 | Kumibinroto                | 1   |
| 25 | Nichinto                   | 3   | 40 | Kakkonkajutsubuto          | 1   |
| 25 | Jidabokuippo               | 3   |    |                            |     |

NEs: Number of reported adverse events; RO: Rank order.

**Table S10.** The ethical Kampo formulations suspected of being related to mesenteric phlebosclerosis

| RO | Ethical Kampo formulations | GF | NEs | RO | Ethical Kampo formulations | GF | NEs |
|----|----------------------------|----|-----|----|----------------------------|----|-----|
| 1  | Orengedokuto               | +  | 57  | 15 | Unseiin                    | +  | 2   |
| 2  | Kamishoyosan               | +  | 54  | 15 | Shimotsuto                 |    | 2   |
| 3  | Inchinkoto                 | +  | 29  | 15 | Seihaito                   | +  | 2   |
| 4  | Shin'iseihaito             | +  | 13  | 21 | Otsujito                   |    | 1   |
| 5  | Shishihakuhito             | +  | 8   | 21 | Saikokaryukotsuboreito     |    | 1   |
| 6  | Kamikihito                 | +  | 7   | 21 | Hangeshashinto             |    | 1   |
| 7  | Bofutsushosan              | +  | 5   | 21 | Shofusan                   |    | 1   |
| 7  | Daikenchuto                |    | 5   | 21 | Tokishakuyakusan           |    | 1   |
| 9  | Keishibukuryogan           |    | 4   | 21 | Daiobotanpito              |    | 1   |
| 9  | Hochuekkito                |    | 4   | 21 | Byakkokaninjinto           |    | 1   |
| 11 | Anchusan                   |    | 3   | 21 | Gorinsan                   | +  | 1   |
| 11 | Shosaikoto                 |    | 3   | 21 | Tokakujokito               |    | 1   |
| 11 | Juzentaihoto               |    | 3   | 21 | Chikujountanto             |    | 1   |
| 11 | Seijobofuto                | +  | 3   | 21 | Ogikenchuto                |    | 1   |
| 15 | Hangekobokuto              |    | 2   | 21 | Inchingoreisan             |    | 1   |
| 15 | Goreisan                   |    | 2   | 21 | Mashiningan                |    | 1   |
| 15 | Shoseiryuto                |    | 2   |    |                            |    |     |

GF: Gardeniae Fructus; NEs: Number of reported adverse events; RO: Rank order.

**Table S11.** Ethical Kampo formulations suspected of being related to drug eruption

| RO | Ethical Kampo formulations | EH | SR | NEs | RO | Ethical Kampo formulations | EH | SR | NEs |
|----|----------------------------|----|----|-----|----|----------------------------|----|----|-----|
| 1  | Kakkonto                   | +  |    | 26  | 24 | Hangeshashinto             |    | +  | 2   |
| 2  | Shoseiryuto                | +  |    | 14  | 24 | Boiogito                   |    |    | 2   |
| 3  | Maoto                      | +  |    | 11  | 24 | Juzentaihoto               |    |    | 2   |
| 4  | Maobushisaishinto          | +  |    | 9   | 24 | Tokiinshi                  |    |    | 2   |
| 5  | Bakumondoto                |    |    | 8   | 24 | Ninjin'yoeito              |    |    | 2   |
| 5  | Daikenchuto                |    |    | 8   | 32 | Anchusan                   |    |    | 1   |
| 7  | Goshajinkigan              |    |    | 7   | 32 | Hangekobokuto              |    |    | 1   |
| 8  | Rikkunshito                |    |    | 6   | 32 | Keishikajutsubuto          |    |    | 1   |
| 9  | Hachimijogan               |    |    | 5   | 32 | Keishibukuryogan           |    |    | 1   |
| 9  | Saikokeishito              |    | +  | 5   | 32 | Eppikajutsuto              | +  |    | 1   |
| 9  | Shakuyakukanzoto           |    |    | 5   | 32 | Shimbuto                   |    |    | 1   |
| 9  | Shosaikotokakikyosekko     |    | +  | 5   | 32 | Goshuyuto                  |    |    | 1   |
| 9  | Saireito                   |    | +  | 5   | 32 | Ninjinto                   |    |    | 1   |
| 14 | Shosaikoto                 |    | +  | 4   | 32 | Hangebyakujutsutemmato     |    |    | 1   |
| 14 | Orengedokuto               |    | +  | 4   | 32 | Chotosan                   |    |    | 1   |
| 14 | Goreisan                   |    |    | 4   | 32 | Keigairengyoto             |    | +  | 1   |
| 14 | Kamishoyosan               |    |    | 4   | 32 | Keishikashakuyakuto        |    |    | 1   |
| 14 | Unseiin                    |    | +  | 4   | 32 | Tokakujokito               |    |    | 1   |
| 19 | Shofusan                   |    |    | 3   | 32 | Jizusoippo                 |    |    | 1   |
| 19 | Tokishakuyakusan           |    |    | 3   | 32 | Daibofuto                  |    |    | 1   |
| 19 | Ryokeijutsukanto           |    |    | 3   | 32 | Seishinrenshiin            |    | +  | 1   |
| 19 | Hochuekkito                |    |    | 3   | 32 | Bukuryoingohangekobokuto   |    |    | 1   |
| 19 | Yokukansan                 |    |    | 3   | 32 | Inchingoreisan             |    |    | 1   |
| 24 | Kakkontokasenyushin'i      | +  |    | 2   | 32 | Senkyuchachosan            |    |    | 1   |
| 24 | Otsujito                   |    | +  | 2   | 32 | Kyukichoketsuin            |    |    | 1   |
| 24 | Jumihaidokuto              |    |    | 2   |    |                            |    |    |     |

EH: Ephedrae Herba; NEs: Number of reported adverse events; RO: Rank order; SR: Scutellariae Radix.

**Table S12.** Ethical Kampo formulations suspected of being related to anaphylaxis

| RO | Ethical Kampo formulations | EH | SR | NEs |
|----|----------------------------|----|----|-----|
| 1  | Kakkonto                   | +  |    | 3   |
| 2  | Shoseiryuto                | +  |    | 2   |
| 2  | Kamishoyosan               |    |    | 2   |
| 2  | Shakuyakukanzoto           |    |    | 2   |
| 2  | Shosaikotokakikyosekko     |    | +  | 2   |
| 6  | Otsujito                   |    | +  | 1   |
| 6  | Saikokeishikankyoto        |    | +  | 1   |
| 6  | Hangekobokuto              |    |    | 1   |
| 6  | Boiogito                   |    |    | 1   |
| 6  | Maoto                      | +  |    | 1   |
| 6  | Bakumondoto                |    |    | 1   |
| 6  | Hangebyakujutsutemmato     |    |    | 1   |
| 6  | Choreito                   |    |    | 1   |
| 6  | Rikkunshito                |    |    | 1   |
| 6  | Goshakusan                 | +  |    | 1   |
| 6  | Jidabokuippo               |    |    | 1   |
| 6  | Shin'iseihaito             |    | +  | 1   |
| 6  | Saireito                   |    | +  | 1   |
| 6  | Bukuryoingohangekobokuto   |    |    | 1   |
| 6  | Maobushisaishinto          | +  |    | 1   |
| 6  | Kikyoto                    |    |    | 1   |

EH: Ephedrae Herba; NEs: Number of reported adverse events; RO: Rank order; SR: Scutellariae Radix.

**Table S13.** Ethical Kampo formulations suspected of being related to allergic cystitis

| RO | Ethical Kampo formulations | SR | NEs |
|----|----------------------------|----|-----|
| 1  | Shosaikoto                 | +  | 4   |
| 2  | Saibokuto                  | +  | 2   |
| 3  | Saikokeishito              | +  | 1   |
| 3  | Seijobofuto                | +  | 1   |
| 3  | Bofutsushosan              | +  | 1   |
| 3  | Ryutanshakanto             | +  | 1   |
| 3  | Saikoseikanto              | +  | 1   |
| 3  | Shokenchuto                |    | 1   |
| 3  | Shin'iseihaito             | +  | 1   |

EH: Ephedrae Herba; NEs: Number of reported adverse events; RO: Rank order; SR: Scutellariae Radix.
